# Supplementary material for: The impact of COVID-19 on patients with asthma
Source: PubMed Central journal article supplement — Eur Respir J. 2021 Mar 4;57(3):2003142. doi: 10.1183/13993003.03142-2020 (PMC7651839; doi:10.1183/13993003.03142-2020), 2021-03-04
Supplement: ERJ-03142-2020.Shareable.pdf [file ERJ-03142-2020.Shareable.pdf]

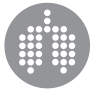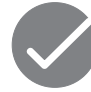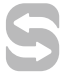

SHAREABLE PDF

# The impact of COVID-19 on patients with asthma

José Luis Izquierdo<sup>1,2</sup>, Carlos Almonacid<sup>2,3</sup>, Yolanda González<sup>4</sup>,  
Carlos Del Rio-Bermudez<sup>4</sup>, Julio Ancochea<sup>5,6,7</sup>, Remedios Cárdenas<sup>8</sup>,  
Sara Lumbreras<sup>4,9</sup> and Joan B. Soriano <sup>5,6,7</sup>

**Affiliations:** <sup>1</sup>Respiratory Medicine, University Hospital of Guadalajara, Guadalajara, Spain. <sup>2</sup>Dept of Medicine and Medical Specialties, University of Alcalá, Madrid, Spain. <sup>3</sup>Respiratory Medicine, University Hospital Ramón y Cajal, Madrid, Spain. <sup>4</sup>Savana Medica, Madrid, Spain. <sup>5</sup>Respiratory Medicine, Hospital Universitario de La Princesa, Madrid, Spain. <sup>6</sup>Universidad Autónoma de Madrid, Madrid, Spain. <sup>7</sup>Centro de Investigación en Red de Enfermedades Respiratorias (CIBERES), Instituto de Salud Carlos III (ISCIII), Madrid, Spain. <sup>8</sup>Allergy, University Hospital of Guadalajara, Guadalajara, Spain. <sup>9</sup>Universidad Pontificia Comillas, Madrid, Spain.

**Correspondence:** Joan B. Soriano, Servicio de Neumología, Hospital Universitario de la Princesa-UAM, Diego de León 62, 28005-Madrid, Spain. E-mail: jbsoriano2@gmail.com

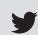

@ERSpublications

The increased risk of hospitalisation due to COVID-19 in patients with asthma is largely associated with age and related comorbidities. ICS and biologics may be associated with a protective effect against the most severe manifestations of COVID-19. <https://bit.ly/37yhr5b>

**Cite this article as:** Izquierdo JL, Almonacid C, González Y, *et al.* The impact of COVID-19 on patients with asthma. *Eur Respir J* 2021; 57: 2003142 [<https://doi.org/10.1183/13993003.03142-2020>].

This single-page version can be shared freely online.

## ABSTRACT

**Background:** An association between the severity of coronavirus disease 2019 (COVID-19) and the presence of certain chronic conditions has been suggested. However, unlike influenza and other viruses, the disease burden of COVID-19 in patients with asthma has been less evident.

**Objective:** To understand the impact of COVID-19 in patients with asthma.

**Methods:** Using big-data analytics and artificial intelligence through the SAVANA Manager clinical platform, we analysed clinical data from patients with asthma from January 1 to May 10, 2020.

**Results:** Out of 71 182 patients with asthma, 1006 (1.41%) suffered from COVID-19. Compared to asthmatic individuals without COVID-19, patients with asthma and COVID-19 were significantly older (55 *versus* 42 years), predominantly female (66% *versus* 59%), smoked more frequently and had higher prevalence of hypertension, dyslipidaemias, diabetes and obesity. Allergy-related factors such as rhinitis and eczema were less common in asthmatic patients with COVID-19 ( $p < 0.001$ ). In addition, higher prevalence of these comorbidities was observed in patients with COVID-19 who required hospital admission. The use of inhaled corticosteroids (ICS) was lower in patients who required hospitalisation due to COVID-19, as compared to non-hospitalised patients (48.3% *versus* 61.5%; OR 0.58, 95% CI 0.44–0.77). Although patients treated with biologics ( $n = 865$ ; 1.21%) showed increased severity and more comorbidities at the ear, nose and throat level, COVID-19-related hospitalisations in these patients were relatively low (0.23%).

**Conclusion:** Patients with asthma and COVID-19 were older and at increased risk due to comorbidity-related factors. ICS and biologics are generally safe and may be associated with a protective effect against severe COVID-19 infection.
