# Supplementary material for: The impact of COVID-19 on patients with asthma
Source: PubMed Central journal article supplement — Eur Respir J. 2021 Mar 4;57(3):2003142. doi: 10.1183/13993003.03142-2020 (PMC7651839; doi:10.1183/13993003.03142-2020), 2021-03-04
Supplement: ERJ-03142-2020.SUPPLEMENT.pdf [file ERJ-03142-2020.SUPPLEMENT.pdf]

## ONLINE APPENDIX

**Table S1. Search terms used to identify patients with bronchial asthma**

- Unstable asthma
- Adult-onset asthma
- Intrinsic asthma
- Asthma attack / Asthma exacerbation
- Acute asthma
- Exercise-induced asthma
- Childhood asthma
- Asthmatic bronchitis
- Cough-variant asthma
- Allergic asthma
- Mild asthma
- Moderate asthma
- Occasional asthma
- Severe asthma
- Chemical-induced asthma
- Substance-induced asthma
- Intermittent asthma
- Seasonal Asthma
- Occupational Asthma
- Chronic obstructive airway disease with asthma
- Asthma with irreversible airway obstruction
- Untreated Asthma
- Persistent asthma
- Induced asthma
- Neutrophilic asthma
- Cortico-dependent asthma
